# Supplementary material
Source: PubMed Central journal article supplement (PMC7450824)
Supplement: NIHMS1595849-supplement-1595849_SuppInfo.pdf [file NIHMS1595849-supplement-1595849_SuppInfo.pdf]

**Supplementary information**

**Supplementary Table 1.** Dose-Limiting Toxicity Criteria.

**Supplementary Table 2.** Detailed adverse events by study arm.

**Supplementary Table 1.** Dose-Limiting Toxicity Criteria; CTCAE: NCI Common Toxicity Criteria for Adverse Events version 4.0.

| Toxicity                                                                              | DLT criteria                                                                                                                                                                                                                                       |
|---------------------------------------------------------------------------------------|----------------------------------------------------------------------------------------------------------------------------------------------------------------------------------------------------------------------------------------------------|
| Blood and lymphatic system disorders                                                  | Anemia CTCAE Grade 3 for > 14 consecutive days                                                                                                                                                                                                     |
|                                                                                       | Anemia CTCAE Grade 4                                                                                                                                                                                                                               |
|                                                                                       | Febrile neutropenia CTCAE Grade $\geq$ 3                                                                                                                                                                                                           |
|                                                                                       | Neutropenia CTCAE Grade 3 for > 7 consecutive days                                                                                                                                                                                                 |
|                                                                                       | Neutropenia CTCAE Grade 4                                                                                                                                                                                                                          |
|                                                                                       | Thrombocytopenia CTCAE Grade 3 for > 7 consecutive days and/or with signs of clinically significant bleeding                                                                                                                                       |
|                                                                                       | Thrombocytopenia CTCAE Grade 4                                                                                                                                                                                                                     |
| Cardiac disorders                                                                     | Cardiac toxicity CTCAE Grade $\geq$ 3 or cardiac event that is symptomatic or requires medical intervention                                                                                                                                        |
|                                                                                       | Clinical signs of cardiac disease, such as unstable angina or myocardial infarction, or Troponin CTCAE Grade 3 (confirmed with a repeat Troponin within 24 hrs)                                                                                    |
|                                                                                       | ECG QTc interval prolonged CTCAE Grade $\geq$ 3                                                                                                                                                                                                    |
| Vascular disorders/<br>Hypertension                                                   | Persistent hypertension CTCAE Grade $\geq$ 3 requiring more than one drug or more intensive therapy than previously                                                                                                                                |
| General disorders and administration site conditions                                  | Fatigue CTCAE Grade 3 for > 7 consecutive days                                                                                                                                                                                                     |
| Skin and subcutaneous tissue disorders <sup>a</sup> :<br>Rash and/or photosensitivity | Rash or photosensitivity CTCAE Grade 3 for >7 consecutive days despite skin toxicity treatment, or any second or third occurrence of CTCAE Grade 3 rash regardless of duration                                                                     |
|                                                                                       | Rash or photosensitivity CTCAE Grade 4                                                                                                                                                                                                             |
| Metabolism and nutrition disorders: Hyperglycemia <sup>b</sup>                        | Hyperglycemia Grade 3 (fasting plasma glucose 250 – 500mg/dL) (confirmed with a repeat fasting plasma glucose test within 48 hours) that does not resolve to grade 0 within 14 consecutive days (after initiation of oral anti-diabetic treatment) |
|                                                                                       |                                                                                                                                                                                                                                                    |
|                                                                                       | Hyperglycemia Grade 4<br>Hyperglycemia leading to diabetic keto-acidosis, hospitalization for IV insulin infusion, or non-ketotic coma                                                                                                             |
| GI disorders <sup>a</sup>                                                             | Diarrhea CTCAE Grade $\geq$ 3 for $\geq$ 48 hrs, despite the use of anti-diarrhea therapy                                                                                                                                                          |
|                                                                                       | Nausea/vomiting CTCAE Grade $\geq$ 3 for $\geq$ 48 hrs, despite the use of anti-emetic therapy                                                                                                                                                     |
|                                                                                       | Pancreatitis CTCAE Grade $\geq$ 3                                                                                                                                                                                                                  |
| Eye disorder                                                                          | CTCAE Grade $\geq$ 3                                                                                                                                                                                                                               |
| Blood chemistries <sup>c</sup>                                                        | Blood bilirubin d CTCAE Grade 2 for > 7 consecutive days                                                                                                                                                                                           |
|                                                                                       | Blood bilirubin d CTCAE Grade $\geq$ 3                                                                                                                                                                                                             |
|                                                                                       | AST or ALT CTCAE Grade $\geq$ 3 in conjunction with blood bilirubin d CTCAE Grade $\geq$ 2 of any duration                                                                                                                                         |
|                                                                                       | AST or ALT CTCAE Grade 3 for > 7 consecutive days                                                                                                                                                                                                  |
|                                                                                       | AST or ALT CTCAE Grade 4                                                                                                                                                                                                                           |
|                                                                                       | Serum alkaline phosphatase CTCAE Grade 4                                                                                                                                                                                                           |
|                                                                                       | Serum lipase and/or serum amylase (asymptomatic) CTCAE Grade 3 for > 7 consecutive days                                                                                                                                                            |
|                                                                                       | Serum lipase and/or serum amylase (asymptomatic) CTCAE Grade 4                                                                                                                                                                                     |

|                                                                                                                                                                                                                                                                                                                                                                                                                                                                                                                                                                                                                                                                                                                                                                                                                                                                                                                                                                                                                                                                                                                                                                                                                                                                                               |                                                                                                                                                                     |
|-----------------------------------------------------------------------------------------------------------------------------------------------------------------------------------------------------------------------------------------------------------------------------------------------------------------------------------------------------------------------------------------------------------------------------------------------------------------------------------------------------------------------------------------------------------------------------------------------------------------------------------------------------------------------------------------------------------------------------------------------------------------------------------------------------------------------------------------------------------------------------------------------------------------------------------------------------------------------------------------------------------------------------------------------------------------------------------------------------------------------------------------------------------------------------------------------------------------------------------------------------------------------------------------------|---------------------------------------------------------------------------------------------------------------------------------------------------------------------|
|                                                                                                                                                                                                                                                                                                                                                                                                                                                                                                                                                                                                                                                                                                                                                                                                                                                                                                                                                                                                                                                                                                                                                                                                                                                                                               | Serum creatinine CTCAE Grade 2 for > 7 consecutive days                                                                                                             |
|                                                                                                                                                                                                                                                                                                                                                                                                                                                                                                                                                                                                                                                                                                                                                                                                                                                                                                                                                                                                                                                                                                                                                                                                                                                                                               | Serum creatinine CTCAE Grade ≥ 3                                                                                                                                    |
| Other hematologic and non-hematologic toxicities                                                                                                                                                                                                                                                                                                                                                                                                                                                                                                                                                                                                                                                                                                                                                                                                                                                                                                                                                                                                                                                                                                                                                                                                                                              | Any other clinically significant CTCAE ≥ Grade 3 toxicity                                                                                                           |
|                                                                                                                                                                                                                                                                                                                                                                                                                                                                                                                                                                                                                                                                                                                                                                                                                                                                                                                                                                                                                                                                                                                                                                                                                                                                                               | Any intolerable CTCAE Grade 2 toxicity                                                                                                                              |
|                                                                                                                                                                                                                                                                                                                                                                                                                                                                                                                                                                                                                                                                                                                                                                                                                                                                                                                                                                                                                                                                                                                                                                                                                                                                                               | Apart from the criteria listed above, if a lower grade AE leads to a dose interruption of more than 7 consecutive days of BYL719, this AE will be considered as DLT |
| <p><sup>a</sup> Patients will receive prophylactic treatment for rash with an antihistamine beginning on cycle 1 day 1. Patients will not initially receive prophylactic treatment for nausea/vomiting during Cycle 1. However, prophylactic treatment may be initiated in all patients at the dose level where these toxicities have been observed and in all further patients if at least 1 patient has experienced nausea/vomiting CTCAE Grade ≥ 3 or if at least 2 patients experienced skin toxicity or nausea/vomiting CTCAE Grade ≥ 2 (see Section 11.2 and Table 10-2 for further details). Anti-emetics may be applied for treatment if the patient has experienced nausea/vomiting CTCAE Grade ≥ 1, at the discretion of the physician.</p> <p><sup>b</sup> Hyperglycemia occurring during corticosteroids administration will be only be considered DLT if not resolved within 5 days after the end of corticosteroid treatment.</p> <p><sup>c</sup> For any hepatic toxicity CTCAE Grade 4, or CTCAE Grade 3 that does not resolve within 7 days to CTCAE Grade ≤ 1 (or CTCAE Grade ≤ 2 if liver infiltration with tumor present), an abdominal CT scan should be performed to assess if it is related to disease progression.</p> <p><sup>d</sup> Refers to total bilirubin.</p> |                                                                                                                                                                     |

**Supplementary Table 2.** Detailed adverse events by study arm.

|                     | Arm A<br>Letrozole +<br>Alpelisib Daily |     |             |    | Arm B<br>Exemestane +<br>Alpelisib Daily |     |             |    | Arm C<br>Letrozole daily +<br>Alpelisib 7d on, 7d off |     |             |    | Arm D<br>Exemestane daily +<br>Alpelisib 5d on, 2d off |     |              |    |          |    | All Arms<br>(n=51) |    |   |     |  |  |   |    |   |    |    |    |   |    |    |    |    |    |
|---------------------|-----------------------------------------|-----|-------------|----|------------------------------------------|-----|-------------|----|-------------------------------------------------------|-----|-------------|----|--------------------------------------------------------|-----|--------------|----|----------|----|--------------------|----|---|-----|--|--|---|----|---|----|----|----|---|----|----|----|----|----|
|                     | 250mg (n=3)                             |     | 300mg (n=4) |    | 300mg (n=7)                              |     | 250mg (n=6) |    | 300mg (n=6)                                           |     | 250mg (n=3) |    | 300mg (n=6)                                            |     | 350mg (n=16) |    | All      |    | G3                 |    |   |     |  |  |   |    |   |    |    |    |   |    |    |    |    |    |
|                     | All<br>n                                | %   | G3<br>n     | %  | All<br>n                                 | %   | G3<br>n     | %  | All<br>n                                              | %   | G3<br>n     | %  | All<br>n                                               | %   | G3<br>n      | %  | All<br>n | %  | G3<br>n            | %  |   |     |  |  |   |    |   |    |    |    |   |    |    |    |    |    |
| <b>General</b>      |                                         |     |             |    |                                          |     |             |    |                                                       |     |             |    |                                                        |     |              |    |          |    |                    |    |   |     |  |  |   |    |   |    |    |    |   |    |    |    |    |    |
| Fatigue             | 3                                       | 100 |             |    | 4                                        | 100 |             |    | 7                                                     | 100 |             |    | 2                                                      | 33  |              |    | 3        | 50 |                    |    | 1 | 33  |  |  | 5 | 83 |   |    | 8  | 50 |   |    | 33 | 65 |    |    |
| Fever               | 0                                       | 0   |             |    | 0                                        | 0   |             |    | 2                                                     | 29  |             |    | 0                                                      | 0   |              |    | 1        | 17 |                    |    | 0 | 0   |  |  | 0 | 0  |   |    | 0  | 0  |   |    | 3  | 6  |    |    |
| Weight Loss         | 0                                       | 0   |             |    | 1                                        | 25  |             |    | 2                                                     | 29  |             |    | 0                                                      | 0   |              |    | 1        | 17 |                    |    | 0 | 0   |  |  | 1 | 17 |   |    | 0  | 0  |   |    | 5  | 10 |    |    |
| Hypotension         | 0                                       | 0   |             |    | 0                                        | 0   |             |    | 0                                                     | 0   |             |    | 0                                                      | 0   |              |    | 1        | 17 | 1                  | 17 | 0 | 0   |  |  | 0 | 0  |   |    | 0  | 0  |   |    | 1  | 2  | 1  | 2  |
| Hot flashes         | 3                                       | 100 |             |    | 1                                        | 25  |             |    | 3                                                     | 43  |             |    | 0                                                      | 0   |              |    | 1        | 17 |                    |    | 0 | 0   |  |  | 1 | 17 |   |    | 2  | 13 |   |    | 11 | 22 |    |    |
| <b>Metabolic</b>    |                                         |     |             |    |                                          |     |             |    |                                                       |     |             |    |                                                        |     |              |    |          |    |                    |    |   |     |  |  |   |    |   |    |    |    |   |    |    |    |    |    |
| Hyperglycemia       | 2                                       | 67  |             |    | 3                                        | 75  |             |    | 4                                                     | 57  | 1           | 14 | 6                                                      | 100 |              |    | 4        | 67 |                    |    | 2 | 67  |  |  | 5 | 83 |   |    | 14 | 87 | 4 | 25 | 40 | 78 | 5  | 10 |
| Hypokalemia         | 0                                       | 0   |             |    | 1                                        | 25  |             |    | 0                                                     | 0   |             |    | 0                                                      | 0   |              |    | 1        | 17 |                    |    | 0 | 0   |  |  | 0 | 0  |   |    | 0  | 0  |   |    | 2  | 4  |    |    |
| Hyperbilirubinemia  | 0                                       | 0   |             |    | 0                                        | 0   |             |    | 0                                                     | 0   |             |    | 0                                                      | 0   |              |    | 0        | 0  |                    |    | 0 | 0   |  |  | 1 | 17 | 1 | 17 | 0  | 0  |   |    | 1  | 2  | 1  | 2  |
| Hypomagnesemia      | 0                                       | 0   |             |    | 0                                        | 0   |             |    | 0                                                     | 0   |             |    | 1                                                      | 17  |              |    | 2        | 33 |                    |    | 0 | 0   |  |  | 0 | 0  |   |    | 0  | 0  |   |    | 3  | 6  |    |    |
| <b>GI</b>           |                                         |     |             |    |                                          |     |             |    |                                                       |     |             |    |                                                        |     |              |    |          |    |                    |    |   |     |  |  |   |    |   |    |    |    |   |    |    |    |    |    |
| Abdominal           | 1                                       | 33  |             |    | 3                                        | 75  | 1           | 25 | 1                                                     | 14  |             |    | 0                                                      | 0   |              |    | 2        | 33 |                    |    | 0 | 0   |  |  | 1 | 17 |   |    | 2  | 12 |   |    | 10 | 20 | 1  | 2  |
| Anorexia            | 2                                       | 67  |             |    | 4                                        | 100 |             |    | 4                                                     | 57  |             |    | 2                                                      | 33  |              |    | 3        | 50 |                    |    | 0 | 0   |  |  | 4 | 67 |   |    | 8  | 50 |   |    | 27 | 53 |    |    |
| Diarrhea            | 1                                       | 33  |             |    | 3                                        | 75  |             |    | 3                                                     | 43  |             |    | 1                                                      | 17  |              |    | 4        | 67 |                    |    | 1 | 33  |  |  | 1 | 17 |   |    | 14 | 87 |   |    | 28 | 55 |    |    |
| Dyspepsia           | 1                                       | 33  |             |    | 3                                        | 75  |             |    | 5                                                     | 71  |             |    | 0                                                      | 0   |              |    | 1        | 17 |                    |    | 1 | 33  |  |  | 3 | 50 |   |    | 6  | 37 |   |    | 20 | 39 |    |    |
| GERD                | 0                                       | 0   |             |    | 0                                        | 0   |             |    | 0                                                     | 0   |             |    | 1                                                      | 17  |              |    | 1        | 17 |                    |    | 0 | 0   |  |  | 2 | 33 |   |    | 3  | 19 |   |    | 7  | 14 |    |    |
| Mucositis           | 2                                       | 67  |             |    | 3                                        | 75  |             |    | 5                                                     | 71  |             |    | 3                                                      | 50  |              |    | 4        | 67 |                    |    | 1 | 33  |  |  | 5 | 83 |   |    | 5  | 31 |   |    | 28 | 55 |    |    |
| Nausea/Vomiting     | 3                                       | 100 |             |    | 4                                        | 100 |             |    | 6                                                     | 86  |             |    | 4                                                      | 67  |              |    | 1        | 17 |                    |    | 3 | 100 |  |  | 1 | 17 |   |    | 5  | 31 |   |    | 27 | 53 |    |    |
| <b>Dermatologic</b> |                                         |     |             |    |                                          |     |             |    |                                                       |     |             |    |                                                        |     |              |    |          |    |                    |    |   |     |  |  |   |    |   |    |    |    |   |    |    |    |    |    |
| Alopecia            | 2                                       | 67  |             |    | 1                                        | 25  |             |    | 1                                                     | 14  |             |    | 2                                                      | 33  |              |    | 0        | 0  |                    |    | 1 | 33  |  |  | 2 | 33 |   |    | 6  | 37 |   |    | 15 | 29 |    |    |
| Dry skin            | 2                                       | 67  |             |    | 2                                        | 50  |             |    | 2                                                     | 29  |             |    | 1                                                      | 17  |              |    | 2        | 33 |                    |    | 1 | 33  |  |  | 1 | 17 |   |    | 2  | 12 |   |    | 13 | 25 |    |    |
| Rash                | 2                                       | 67  | 1           | 33 | 3                                        | 75  | 2           | 50 | 4                                                     | 57  | 4           | 57 | 3                                                      | 50  | 2            | 33 | 2        | 33 | 2                  | 33 | 0 | 0   |  |  | 2 | 33 | 2 | 33 | 6  | 37 | 4 | 25 | 22 | 43 | 17 | 33 |
| <b>Cardiac</b>      |                                         |     |             |    |                                          |     |             |    |                                                       |     |             |    |                                                        |     |              |    |          |    |                    |    |   |     |  |  |   |    |   |    |    |    |   |    |    |    |    |    |

|                        |   |     |  |   |    |   |    |   |    |  |   |     |   |    |    |   |   |    |  |   |    |  |   |    |   |    |    |    |   |   |
|------------------------|---|-----|--|---|----|---|----|---|----|--|---|-----|---|----|----|---|---|----|--|---|----|--|---|----|---|----|----|----|---|---|
| QTc prolongation       | 3 | 100 |  | 3 | 75 | 1 | 25 | 3 | 43 |  | 6 | 100 |   | 4  | 67 |   | 2 | 67 |  | 4 | 67 |  | 3 | 19 |   | 28 | 55 | 1  | 2 |   |
| <b>Respiratory</b>     |   |     |  |   |    |   |    |   |    |  |   |     |   |    |    |   |   |    |  |   |    |  |   |    |   |    |    |    |   |   |
| Dyspnea                | 1 | 33  |  | 0 | 0  |   |    | 1 | 14 |  | 1 | 17  |   | 2  | 33 |   | 0 | 0  |  | 2 | 33 |  | 2 | 12 |   | 9  | 18 |    |   |   |
| <b>Rheumatologic</b>   |   |     |  |   |    |   |    |   |    |  |   |     |   |    |    |   |   |    |  |   |    |  |   |    |   |    |    |    |   |   |
| Arthralgia             | 2 | 67  |  | 3 | 75 |   |    | 1 | 14 |  | 1 | 17  |   | 1  | 17 |   | 0 | 0  |  | 0 | 0  |  | 3 | 19 |   | 11 | 22 |    |   |   |
| Joint ROM reduced      | 2 | 67  |  | 1 | 25 |   |    | 3 | 43 |  | 0 | 0   |   | 0  | 0  |   | 0 | 0  |  | 0 | 0  |  | 0 | 0  |   | 6  | 12 |    |   |   |
| <b>Hematologic</b>     |   |     |  |   |    |   |    |   |    |  |   |     |   |    |    |   |   |    |  |   |    |  |   |    |   |    |    |    |   |   |
| Anemia                 | 1 | 33  |  | 1 | 25 |   |    | 2 | 29 |  | 3 | 50  |   | 1  | 17 |   | 0 | 0  |  | 1 | 17 |  | 0 | 0  |   | 9  | 18 |    |   |   |
| Lymphopenia            | 0 | 0   |  | 1 | 25 | 1 | 25 | 0 | 0  |  | 1 | 17  | 1 | 17 | 0  | 0 | 0 | 0  |  | 0 | 0  |  | 1 | 6  | 1 | 6  | 3  | 6  | 3 | 6 |
| Thrombocytopenia       | 0 | 0   |  | 0 | 0  |   |    | 2 | 29 |  | 0 | 0   |   | 0  | 0  |   | 0 | 0  |  | 1 | 17 |  | 0 | 0  |   | 3  | 6  |    |   |   |
| Leukopenia             | 1 | 33  |  | 0 | 0  |   |    | 3 | 43 |  | 1 | 17  |   | 1  | 17 |   | 0 | 0  |  | 0 | 0  |  | 1 | 6  |   | 7  | 14 |    |   |   |
| <b>Neurologic</b>      |   |     |  |   |    |   |    |   |    |  |   |     |   |    |    |   |   |    |  |   |    |  |   |    |   |    |    |    |   |   |
| Dizziness              | 0 | 0   |  | 1 | 25 |   |    | 3 | 43 |  | 1 | 17  |   | 1  | 17 |   | 1 | 33 |  | 0 | 0  |  | 0 | 0  |   | 7  | 14 |    |   |   |
| Dysgeusia              | 1 | 33  |  | 0 | 0  |   |    | 1 | 14 |  | 0 | 0   |   | 0  | 0  |   | 1 | 33 |  | 2 | 33 |  | 5 | 31 |   | 10 | 20 |    |   |   |
| <b>Investigational</b> |   |     |  |   |    |   |    |   |    |  |   |     |   |    |    |   |   |    |  |   |    |  |   |    |   |    |    |    |   |   |
| ALP increased          | 0 | 0   |  | 2 | 50 |   |    | 1 | 14 |  | 1 | 17  |   | 2  | 33 |   | 0 | 0  |  | 2 | 33 |  | 4 | 25 |   | 12 | 24 |    |   |   |
| ALT increased          | 0 | 0   |  | 0 | 0  |   |    | 4 | 57 |  | 2 | 33  |   | 2  | 33 |   | 0 | 0  |  | 2 | 33 |  | 5 | 31 |   | 15 | 29 |    |   |   |
| AST increased          | 1 | 33  |  | 0 | 0  |   |    | 3 | 43 |  | 1 | 17  |   | 3  | 50 |   | 0 | 0  |  | 2 | 33 |  | 6 | 37 |   | 16 | 31 |    |   |   |
| Hypoalbuminemia        | 0 | 0   |  | 0 | 0  |   |    | 2 | 29 |  | 0 | 0   |   | 0  | 0  |   | 0 | 0  |  | 0 | 0  |  | 3 | 19 |   | 5  | 10 |    |   |   |
| Hypocalcemia           | 1 | 33  |  | 1 | 25 |   |    | 1 | 14 |  | 0 | 0   |   | 2  | 33 |   | 0 | 0  |  | 0 | 0  |  | 0 | 0  |   | 5  | 10 |    |   |   |
| Hypernatremia          | 0 | 0   |  | 0 | 0  |   |    | 1 | 14 |  | 0 | 0   |   | 0  | 0  |   | 0 | 0  |  | 0 | 0  |  | 3 | 19 |   | 4  | 8  |    |   |   |
| Hypoglycemia           | 0 | 0   |  | 0 | 0  |   |    | 0 | 0  |  | 0 | 0   |   | 0  | 0  |   | 0 | 0  |  | 0 | 0  |  | 0 | 0  |   | 0  | 0  |    |   |   |
| Lipase increased       | 2 | 67  |  | 1 | 25 |   |    | 3 | 43 |  | 2 | 33  |   | 2  | 33 |   | 0 | 0  |  | 3 | 50 |  | 6 | 37 | 2 | 12 | 19 | 37 | 2 | 4 |
| Amylase increased      | 0 | 0   |  | 2 | 50 |   |    | 0 | 0  |  | 0 | 0   |   | 0  | 0  |   | 1 | 17 |  | 0 | 0  |  | 4 | 25 |   | 7  | 14 |    |   |   |
